# Supplementary material
Source: MDPI journal article supplement (https://www.mdpi.com/2073-4344/12/5/559)
Supplement: s1 [file s1]

# Electronic Supplementary Material

## Yttria-stabilized zirconia of balanced acid–base pair for selective dehydration of 4-methyl-2-pentanol to 4-methyl-1-pentene

Jae-Hong Lee<sup>a</sup>, Minseok Kim<sup>a</sup>, Suhyun Lim<sup>a</sup>, Dinesh Kumar Mishra<sup>a,b</sup>,

Young-Woong Suh<sup>\*,a,b</sup>

<sup>a</sup> Department of Chemical Engineering, Hanyang University, Seoul 04763,  
Republic of Korea

<sup>b</sup> Research Institute of Industrial Science, Hanyang University, Seoul 04763,  
Republic of Korea

\* Corresponding author E-mail: ywsuh@hanyang.ac.kr (Y.-W. Suh)

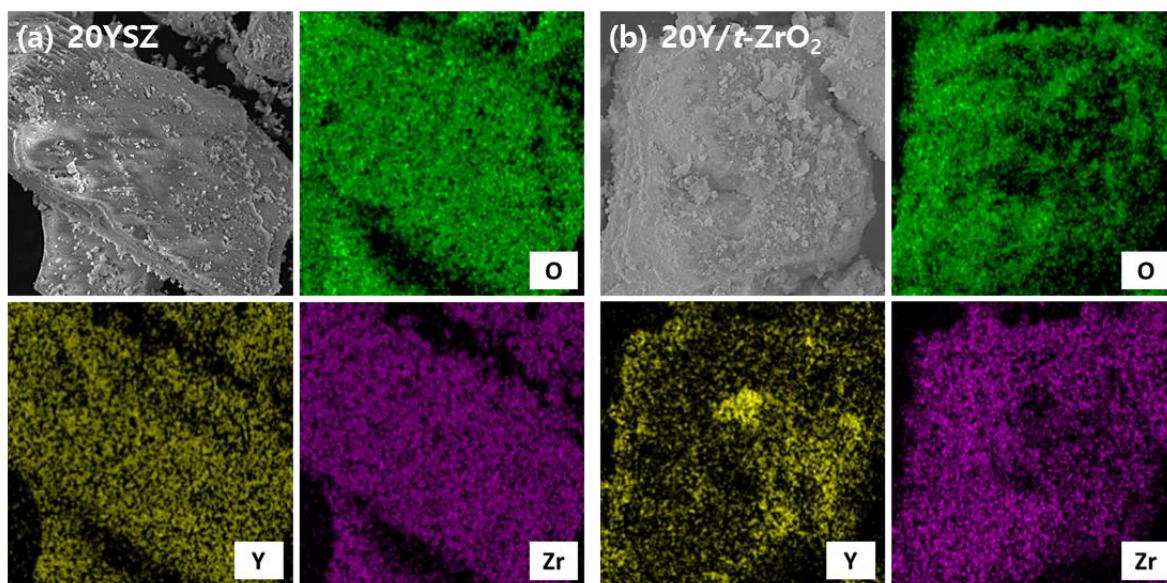

**Figure S1.** FE-SEM images and elemental mapping images (O, Y, and Zr) of (a) 20YSZ and (b) 20Y/t-ZrO<sub>2</sub>.

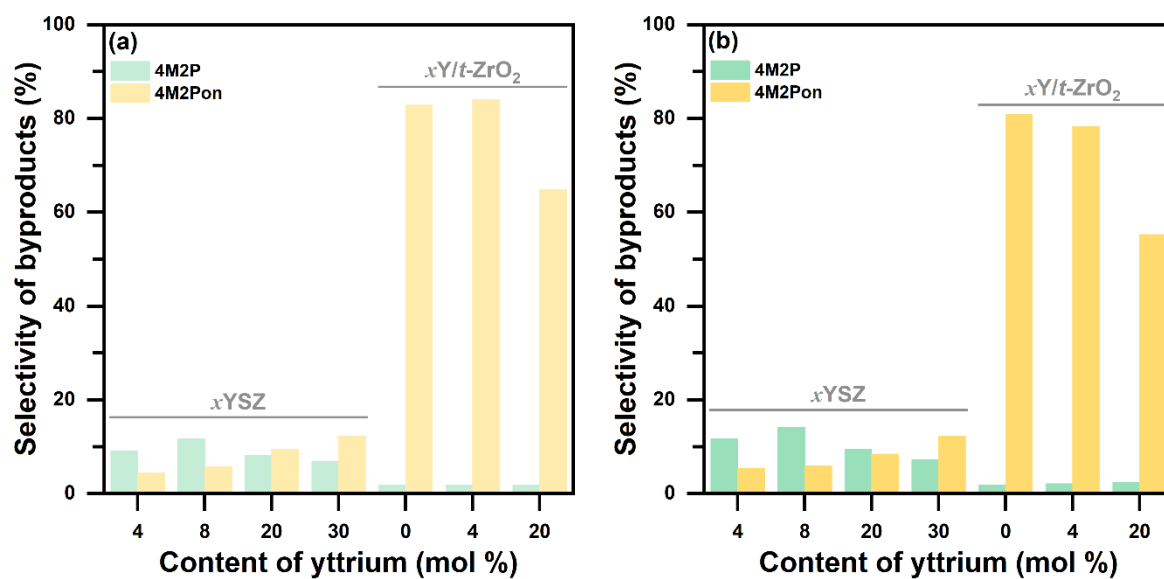

**Figure S2.** Selectivity of by-products such as 4M2P and 4M2Pon in 4M2Pol dehydration at (a) 350 °C and (b) 375 °C.

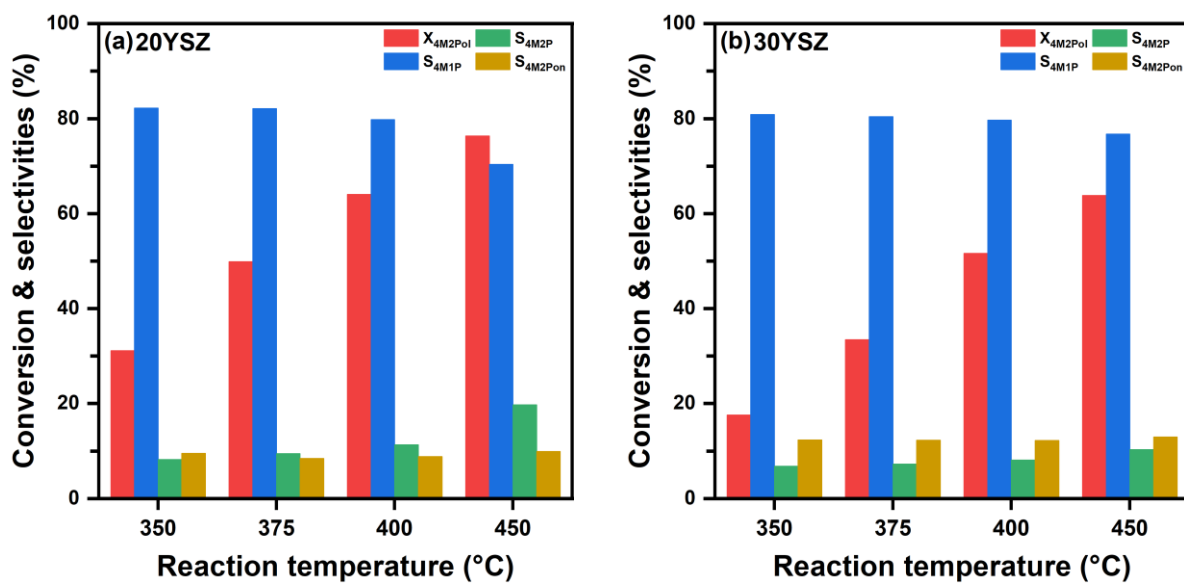

**Figure S3.** 4M2P conversion and product selectivity in 4M2Pol dehydration over (a) 20YSZ and (b) 30YSZ at 350 to 450 °C.

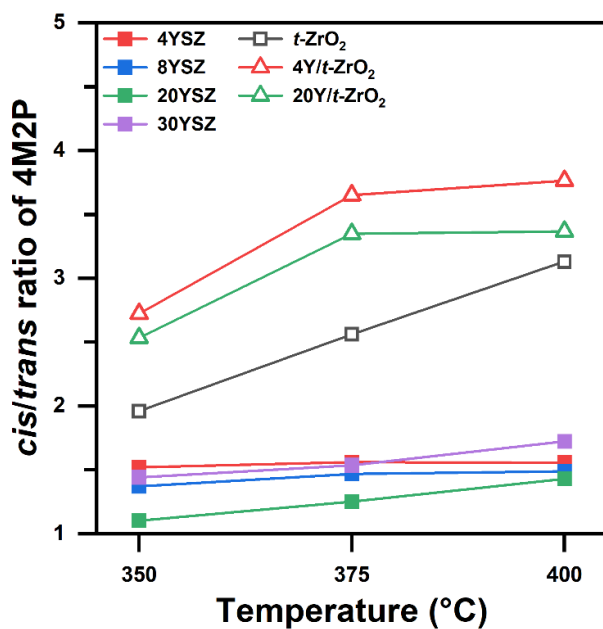

**Figure S4.** Ratio of *cis*- to *trans*-4M2P at 350, 375, and 400 °C over the co-precipitated  $x$ YSZ ( $x = 4, 8, 20$ , and 30) and impregnated  $x$ Y/ $t\text{-ZrO}_2$  ( $x = 4$  and 20) catalysts along with bare  $t\text{-ZrO}_2$ .

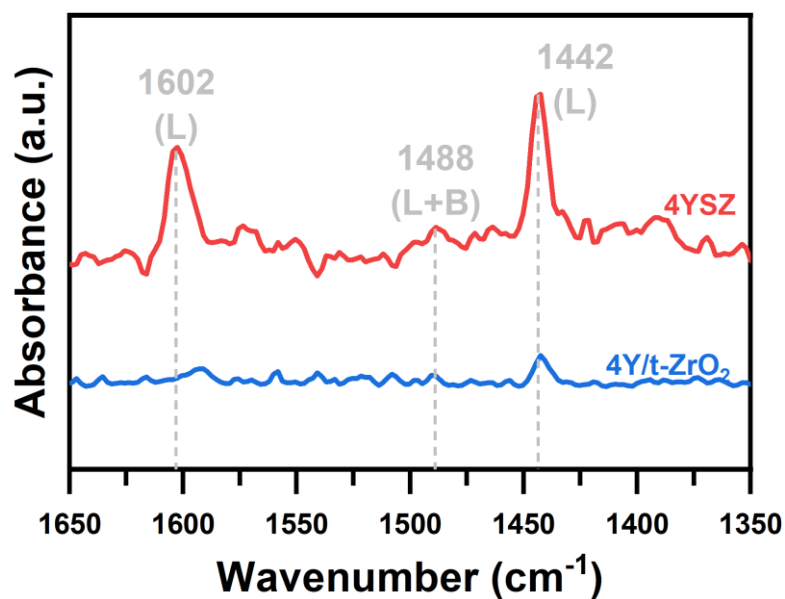

**Figure S5.** Pyridine-chemisorbed FT-IR spectra of the catalysts 4YSZ and 4Y/*t*-ZrO<sub>2</sub>.

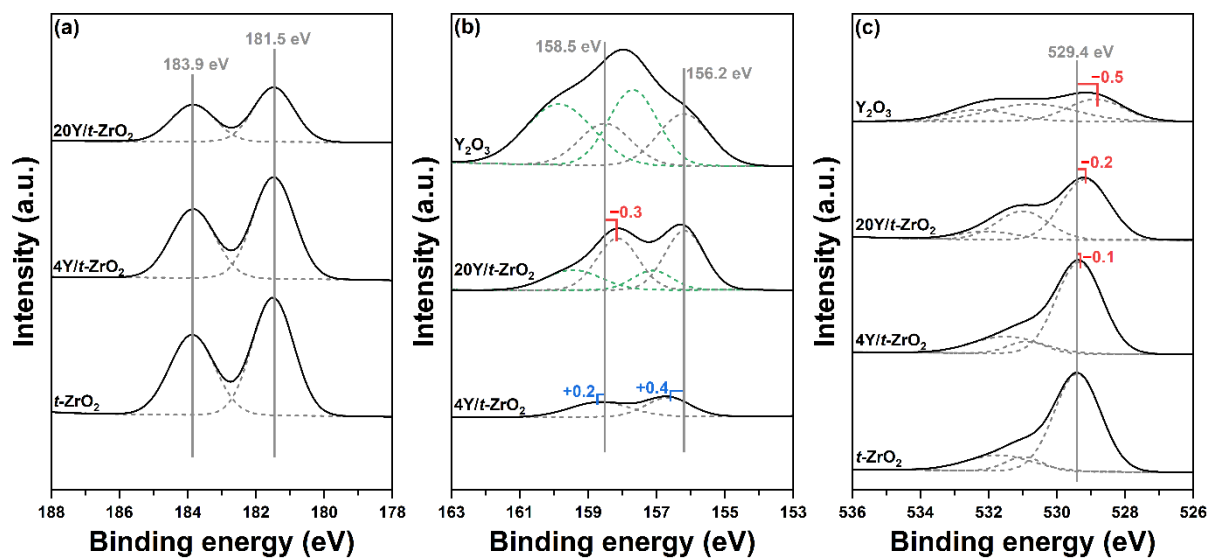

**Figure S6.** XPS spectra of the impregnated Y/*t*-ZrO<sub>2</sub> catalysts in the core levels of (a) Zr 3d, (b) Y 3d, and (c) O 1s. The spectra of *t*-ZrO<sub>2</sub> and/or Y<sub>2</sub>O<sub>3</sub> are added for comparison.

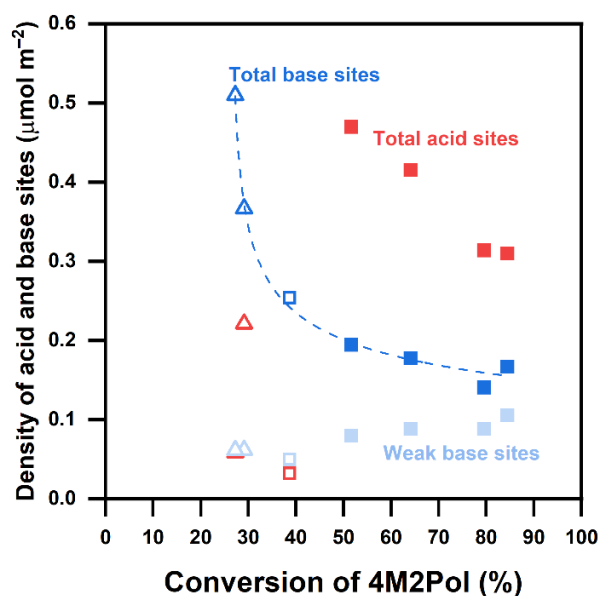

**Figure S7.** Correlation of 4M2Pol conversion with the surface density of total acid sites, weak base sites, and total base sites of  $x$ YSZ (filled squares),  $x$ Y/ $t$ -ZrO<sub>2</sub> (open triangles), and bare  $t$ -ZrO<sub>2</sub> (open squares).

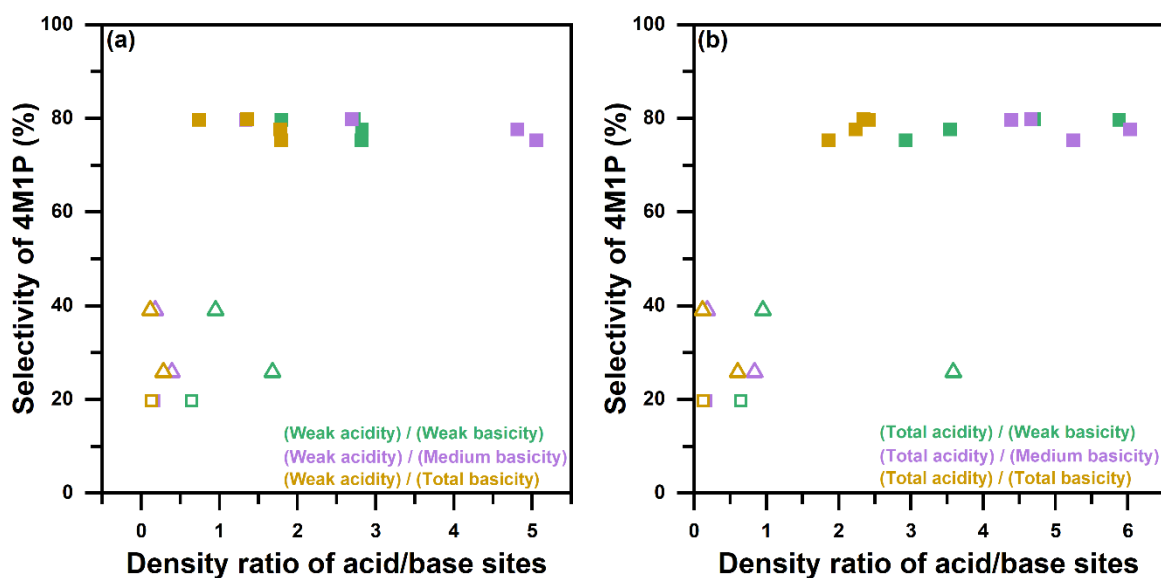

**Figure S8.** Correlation of 4M1P selectivity with various surface density ratios. (a) Weak acidity to weak, medium, and total basicity. (b) Total acidity to weak, medium, and total basicity for  $x$ YSZ (filled squares),  $x$ Y/ $t$ -ZrO<sub>2</sub> (open triangles), and bare  $t$ -ZrO<sub>2</sub> (open squares).

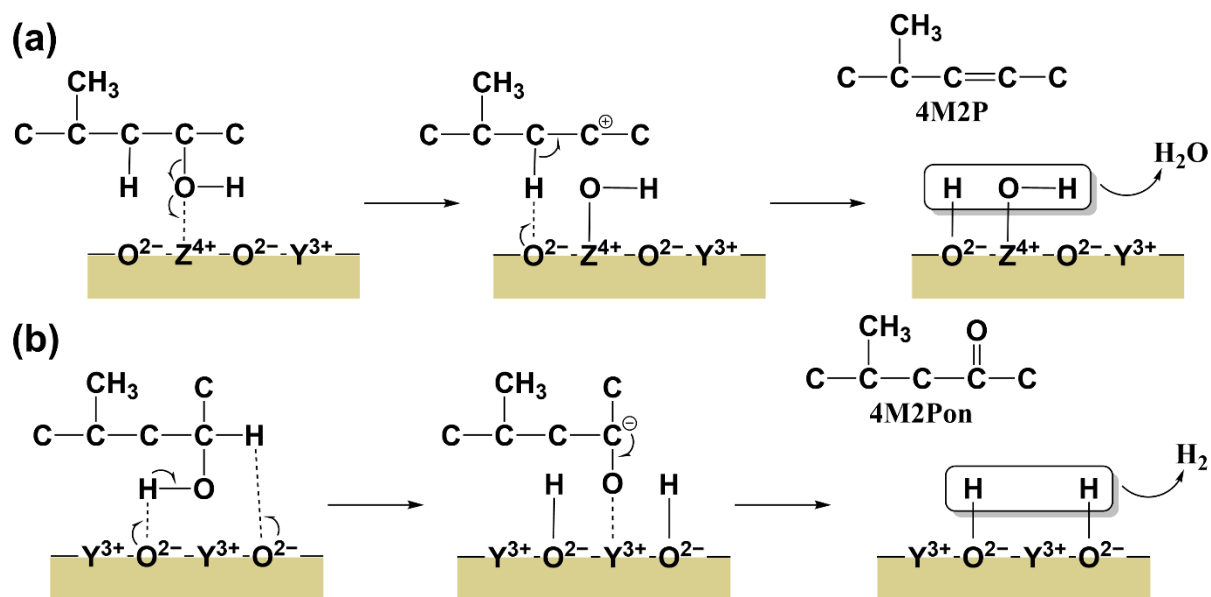

**Figure S9.** Plausible mechanism on the conversion of 4M2Pol. (a) Formation of 4M2P via E1 mechanism over YSZ. (b) Formation of 4M2Pon via dehydrogenation mechanism over YSZ.
